# Supplementary material
Source: publisher figshare collection journal article supplement (https://acs.figshare.com/ndownloader/files/12941708)
Supplement: Supplementary file 1 [file 12941708]

## SUPPORTING INFORMATION

### **“A single-component optogenetic system allows stringent switch of gene expression in yeast cells”**

Xiaopei Xu<sup>1,2</sup>, Zhaoxia Du<sup>1,2</sup>, Renmei Liu<sup>1,2</sup>, Ting Li<sup>1,2</sup>, Yuzheng Zhao<sup>1,2,3</sup>, Xianjun Chen<sup>1,2,3,\*</sup>, Yi Yang<sup>1,2,\*</sup>

<sup>1</sup> *Optogenetics & Synthetic Biology Interdisciplinary Research Center, State Key Laboratory of Bioreactor Engineering, Shanghai Collaborative Innovation Center for Biomanufacturing Technology, East China University of Science and Technology, 130 Mei Long Road, Shanghai 200237, China.*

<sup>2</sup> *CAS Center for Excellence in Brain Science, Shanghai Institutes for Biological Sciences, Chinese Academy of Sciences, Shanghai 200031, China*

<sup>3</sup> *Shanghai Key Laboratory of New Drug Design, School of Pharmacy, East China University of Science and Technology, 130 Mei Long Road, Shanghai 200237, China.*

*\*Correspondence and requests for materials should be addressed to X.C.(xianjunchen@ecust.edu.cn) and Y.Y. (yiyang@ecust.edu.cn)*

**This file includes:**

**Figures S1 to S10**

**Tables S1 to S3**

**Supplementary Note**

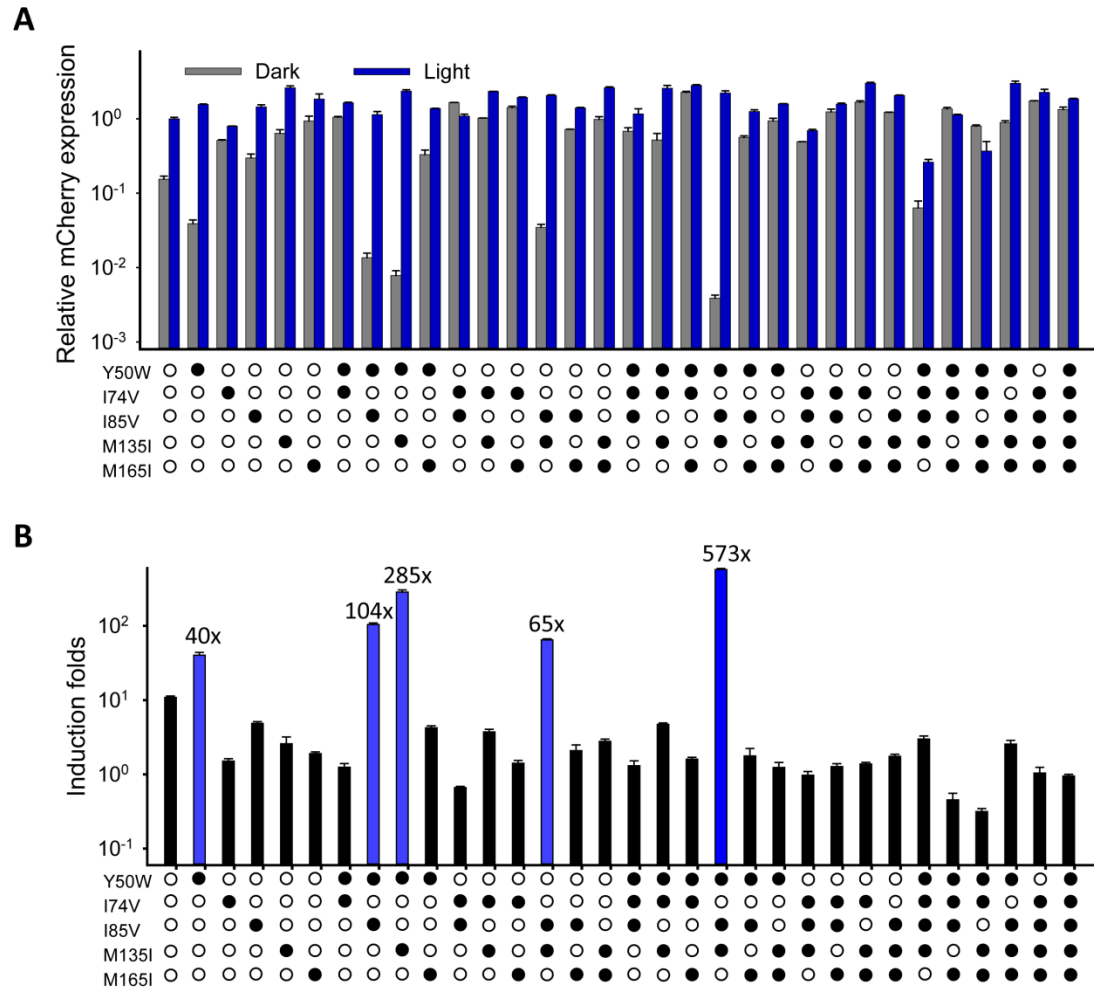

**Figure S1** Light-induced gene activation by LVAD mutants. The engineered BY4742 cells transformed with the response plasmid ( $8xLexA_{op}$ - $Gal1_{min}$ - $mCherry$ ) and the activator plasmid expressing different LVAD mutants were cultured in light or dark conditions for 24 h before mCherry fluorescence was measured (**A**) and induction folds (the ratio of mCherry fluorescence in light and dark conditions) were calculated (**B**). White circle indicated no mutation at this site. Black circle indicated mutation at this site. Data in (**A**) and (**B**) are means of three independent experiments, and error bars indicate the standard deviation.

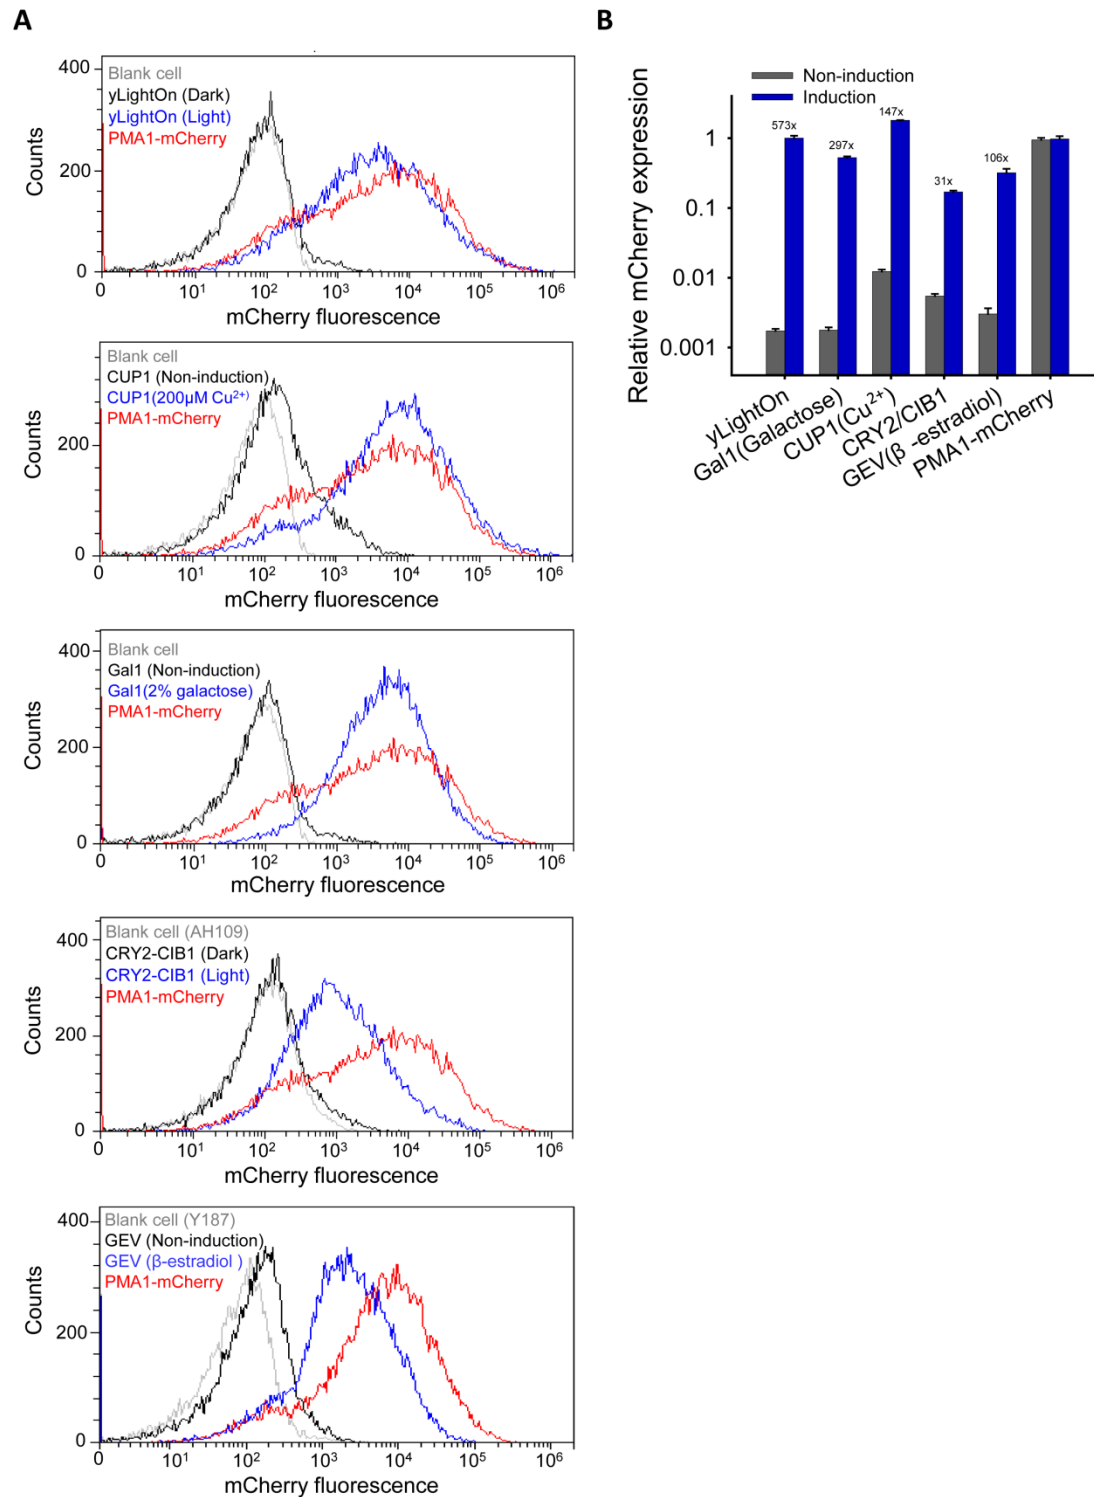

**Figure S2** Flow cytometry and statistic results of the light- or chemical-inducible systems. **(A)** FACS analysis of the light- or chemical-inducible systems. The BY4742 cells were transformed with pLGal1-mCherry and pADH1(410)-LVADO, or with pCUP1-mCherry, or with pGal1-mCherry. The AH109 cells were transformed with pU5Gal1-mCherry, pGal4BD-CRY2 and pGal4AD-CIB1. The Y187 cells were transformed with pRS316-ACT1-GEV and pRS315-U5Gal1-mCherry. The engineered cells were cultured in non-inducing conditions (for light-inducible systems: dark; for

CUP1, Gal1 and GEV: in the absence of  $\text{Cu}^{2+}$ , galactose and  $\beta$ -estradiol, respectively) or inducing conditions (for light-inducible systems: blue light; for CUP1 and Gal1: in the presence of 200  $\mu\text{M}$   $\text{Cu}^{2+}$ , 2% galactose and 100 nM  $\beta$ -estradiol, respectively). *PMA1*, a strong yeast constitutive promoter, was used as the control. **(B)** Statistics of the FACS results in **(A)**. Fluorescence was normalized to yLightOn system in light illumination. Data are means of three independent experiments, and error bars indicate the standard deviation.

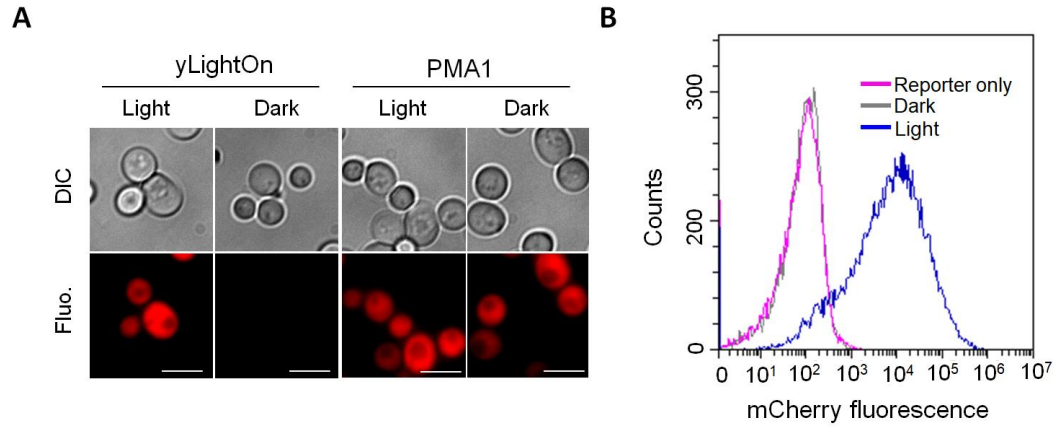

**Figure S3** Light-switchable gene expression by yLightOn system. **(A)** The engineered BY4742 cells transformed with yLightOn system using mCherry as the reporter were cultured in light or dark conditions for 24 h before imaging of mCherry fluorescence. *PMA1*, a strong yeast constitutive promoter, was used as the control. Scale bars, 5  $\mu$ m. **(B)** FACS analysis of light-switchable gene expression by yLightOn system (n=20,000). The BY4742 cells transformed with only the response plasmid were used as the control.

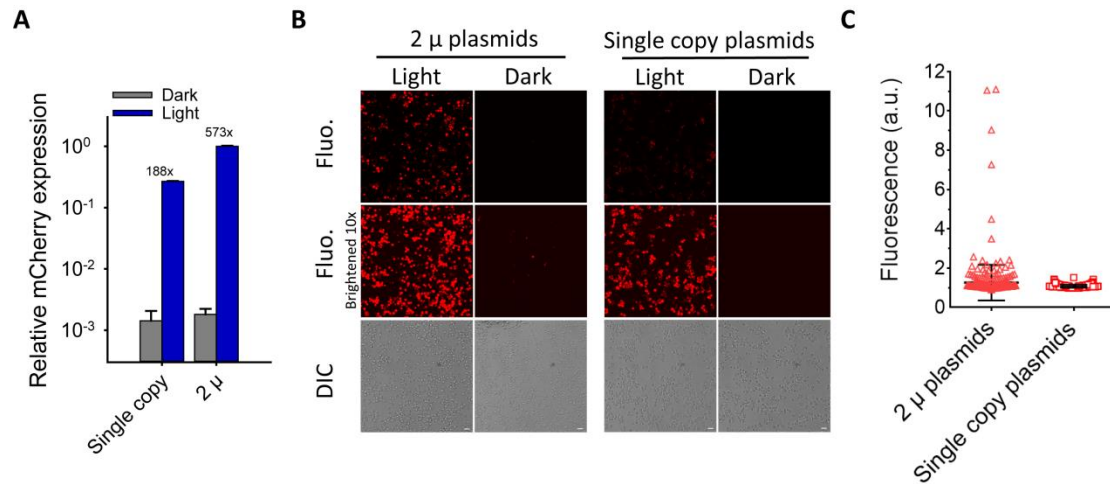

**Figure S4** Light-induced mCherry expression by yLightOn system in 2  $\mu$  plasmids or single copy plasmids. **(A)** The engineered BY4742 cells transformed with yLightOn system in 2  $\mu$  plasmids or single copy plasmids using mCherry as the reporter were cultured in light or dark conditions for 24 h before imaging of mCherry fluorescence. Data are means of three independent experiments, and error bars indicate the standard deviation. **(B)** Fluorescence imaging of mCherry fluorescence. Scale bars, 10  $\mu$ m. **(C)** Statistics analysis of mCherry expression in dark conditions (n=400 from 3 fields).

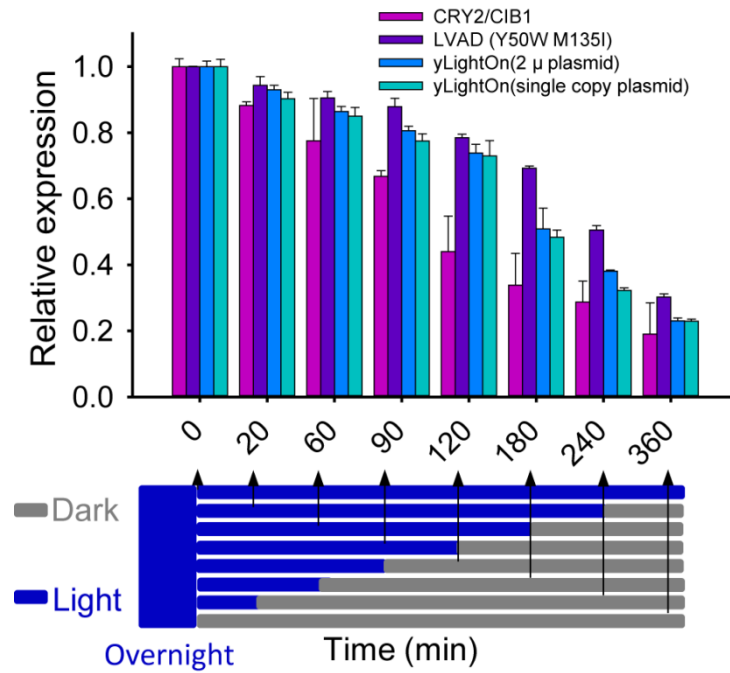

**Figure S5** Decay kinetics of the light-switchable gene expression systems from a pulse experiment. The engineered cells were treated with different durations of dark conditions and mCherry fluorescence was measured at 6 h. Data are means of three independent experiments, and error bars indicate the standard deviation.

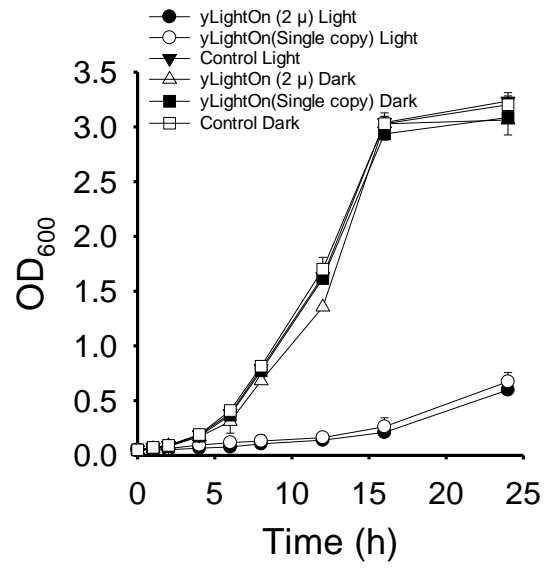

**Figure S6** Growth rate of the engineered cells expressing  $\Delta^N$ Sic1 in light and dark conditions. Data are means of three independent experiments, and error bars indicate the standard deviation.



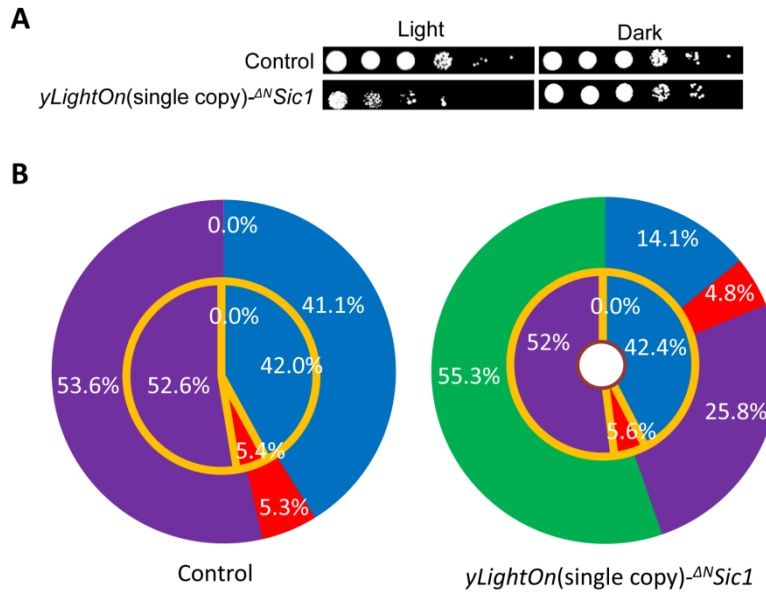

**Figure S7** Cell cycle progression controlled by *yLightOn* system in single copy plasmids. **(A)** The engineered TUB1/YML085C (*Tub*-GFP) cells transformed with *yLightOn* system in single copy plasmids using <sup>ΔN</sup>Sic1 as the reporter were serially diluted (1:10; first spot approximately 10<sup>5</sup> cells) and grown in solid medium under light or dark conditions. **(B)** The same yeast cells as in **(A)** were cultured in light or dark conditions for 10 h before imaging. Circular graphs (inner ring, dark conditions; outer ring, light conditions) show the mean distribution of cell cycle stages obtained from six biological replicates counting at least 100 cells for each replicate.

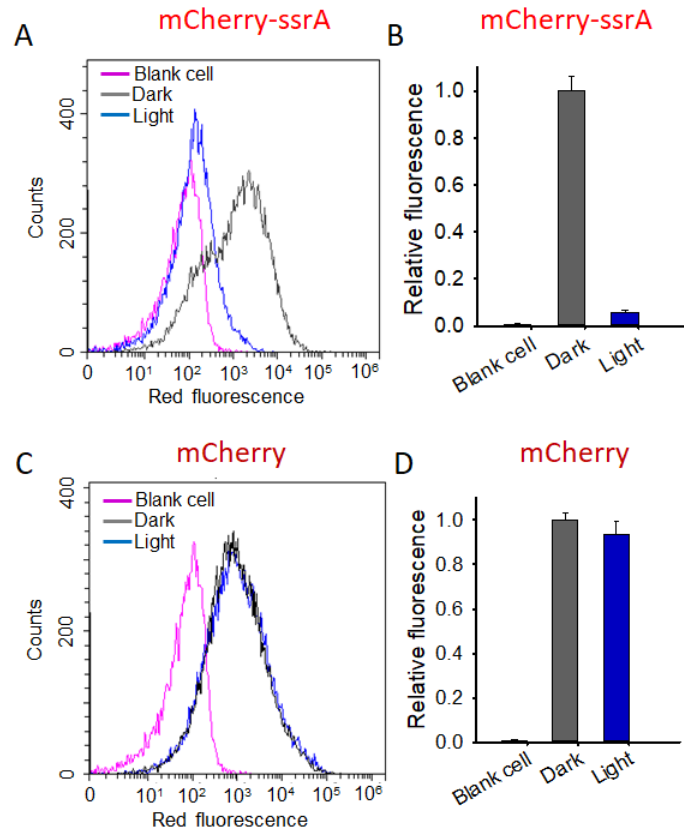

**Figure S8** FACS analysis of degradation of ssrA-tagged mCherry. The BY4742 cells transformed with pBi-ClpX-ClpP and pADH1(410)-LVADO-ADH1-mCherry-ssrA **(A)** or pADH1(410)-LVADO-ADH1-mCherry **(C)** were cultured in light or dark conditions for 24 h before analysis of mCherry fluorescence by flow cytometry. **(B)** and **(D)** The statistics of the FACS results in **(A)** and **(C)**, respectively. Data are means of three independent experiments, and error bars indicate the standard deviation.

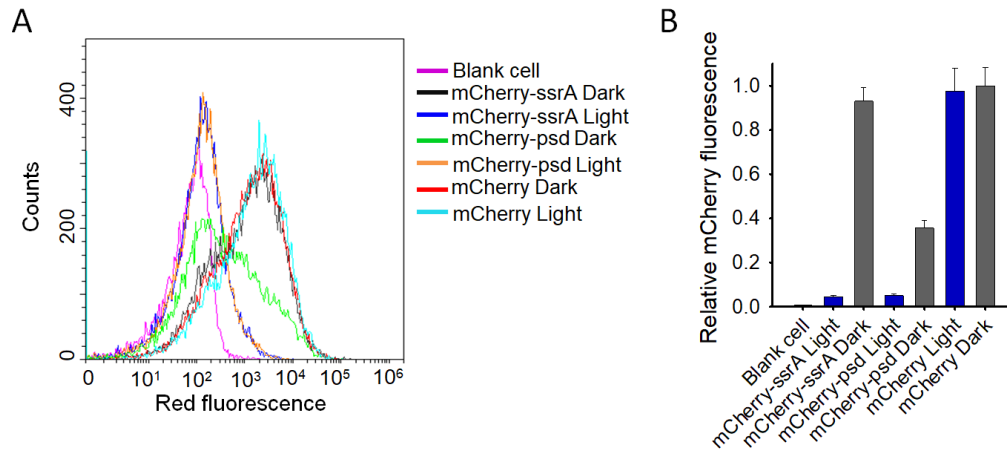

**Figure S9** Comparison of ClpX/ClpP and psd degradation systems. **(A)** The BY4742 cells were transformed with pADH1(410)-LVADO-ADH1-mCherry-ssrA and pBi-ClpX-ClpP, or with pADH1-mCherry-psd. The engineered cells were cultured in light or dark conditions for 24 h before analysis of mCherry fluorescence by flow cytometry. mCherry without degradation tag driven by ADH1 promoter were used as the controls. **(B)** The statistics of the FACS results in **(A)**. Fluorescence was normalized to mCherry without degradation tag driven by ADH1 promoter in dark conditions. Data are means of three independent experiments, and error bars indicate the standard deviation.

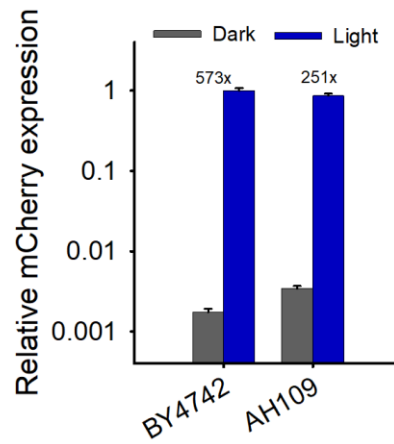

**Figure S10** Light-switched gene expression by  $\gamma$ LightOn system in different yeast strains. The engineered BY4742 and AH109 cells transformed with  $\gamma$ LightOn system using mCherry as the reporter were cultured in light or dark conditions for 24 h before mCherry fluorescence was determined. Fluorescence was normalized to  $\gamma$ LightOn system in BY4742 cells upon light illumination. Data are means of three independent experiments, and error bars indicate the standard deviation.

**Table S1** Hill function fitting results for gene expression activation by light-switchable gene expression systems.

| Parameter       | LVADO          |                    | LVAD (Y50W M135I) |                    | CRY2/CIB1      |                    | Unit             |
|-----------------|----------------|--------------------|-------------------|--------------------|----------------|--------------------|------------------|
|                 | Best-fit value | Fit standard error | Best-fit value    | Fit standard error | Best-fit value | Fit standard error |                  |
| <b><i>a</i></b> | 1.0298         | 0.1433             | 1.0219            | 0.0947             | 1.2246         | 0.2400             |                  |
| <b><i>b</i></b> | 0.0059         | 0.0048             | 0.0036            | 0.0005             | 0.0434         | 0.0040             |                  |
| <b><i>n</i></b> | 2.6027         | 0.7457             | 0.9811            | 0.0711             | 0.7856         | 0.0912             |                  |
| <b><i>k</i></b> | 0.6537         | 0.1254             | 0.0608            | 0.0164             | 0.2732         | 0.0869             | W/m <sup>2</sup> |

Data fitted to activating Hill function  $[b + (a * I r^n)/(I r^n + k^n)]$  using the method of least squares<sup>1</sup>.

*b* represents the leak expression in darkness.

*a+b* represents the maximal expression when cells were illuminated with light of infinite intensity

*n* represents Hill coefficient.

*k* represents the light intensity for half-maximal response.

**Table S2** Hill function fitting results for protein degradation

| Parameter       | mCherry-ssrA   |                    | mCherry-psd    |                    | Unit             |
|-----------------|----------------|--------------------|----------------|--------------------|------------------|
|                 | Best-fit value | Fit standard error | Best-fit value | Fit standard error |                  |
| <b><i>a</i></b> | 0.9794         | 0.1015             | 1.0135         | 0.2046             |                  |
| <b><i>b</i></b> | 0.0339         | 0.0010             | 0.0401         | 0.0659             |                  |
| <b><i>n</i></b> | 2.0518         | 0.1422             | 0.6596         | 0.1652             |                  |
| <b><i>k</i></b> | 0.0664         | 0.0109             | 0.2926         | 0.1742             | W/m <sup>2</sup> |

Data fitted to repressing Hill function  $[b + (a * k^n)/(I r^n + k^n)]$  using the method of least squares<sup>1</sup>.

*b* represents the background expression when cells were illuminated with light of infinite intensity.

*a+b* represents the maximal expression in darkness.

*n* represents Hill coefficient.

*k* represents the light intensity for half-maximal response.

**Table S3** Plasmids designed and used in this study

| Plasmids        | Description                                                                                                                                                                                                                                                                                                                                                                                                                                                                   | Replication region | Selectable markers | Reference or source |
|-----------------|-------------------------------------------------------------------------------------------------------------------------------------------------------------------------------------------------------------------------------------------------------------------------------------------------------------------------------------------------------------------------------------------------------------------------------------------------------------------------------|--------------------|--------------------|---------------------|
| pSH18-34        | A reporter vector containing eight copies of LexA operator sequence and Gal1 minimal promoter driven expression of LacZ                                                                                                                                                                                                                                                                                                                                                       | 2 $\mu$            | URA3               | Invitrogen          |
| pGal4BD-CRY2    | Constitutive expression of Gal4BD-CRY2 under the control of ADH1 promoter.                                                                                                                                                                                                                                                                                                                                                                                                    | 2 $\mu$            | TRP1               | Addgene             |
| pGal4AD-CIB1    | Constitutive expression of Gal4AD-CIB1 under the control of ADH1 promoter.                                                                                                                                                                                                                                                                                                                                                                                                    | 2 $\mu$            | LEU2               | Addgene             |
| pLEVI-mCherry   | Constitutive light-switchable-transcription factor LEVI expression vector.                                                                                                                                                                                                                                                                                                                                                                                                    | CDF(E.coli)        | —                  | Ref. 2              |
| pLEVI-sfGFP     | Constitutive light-switchable transcription factor LEVI expression vector.                                                                                                                                                                                                                                                                                                                                                                                                    | CDF(E.coli)        | —                  | Ref. 2              |
| pGAVPO          | Constitutive light-switchable transactivation factor GAVPO expression vector.                                                                                                                                                                                                                                                                                                                                                                                                 |                    |                    | Ref. 3              |
| pU5-Gluc        | A reporter vector for LighOn system containing five copies of UAS <sub>G</sub> and E1b minimal promoter driven expression of Gluc.                                                                                                                                                                                                                                                                                                                                            | pUC(E.coli)        | —                  | Ref. 3              |
| pGADT7          | A commercialized plasmid vector containing ADH1 promoter.                                                                                                                                                                                                                                                                                                                                                                                                                     | 2 $\mu$            | LEU2               | Clontech            |
| pYES2.1 TOPO    | A commercialized plasmid vector containing Gal1 promoter.                                                                                                                                                                                                                                                                                                                                                                                                                     | 2 $\mu$            | URA3               | Invitrogen          |
| pGBKT7          | A commercialized plasmid vector containing ADH1 promoter and Gal4 activation domain.                                                                                                                                                                                                                                                                                                                                                                                          | 2 $\mu$            | TRP1               | Clontech            |
| pL8Gal1-mCherry | A reporter vector for $\gamma$ LighOn system containing eight copies of LexA operator sequence and Gal1 minimal promoter driven expression of mCherry. Eight copies of LexA operator sequence was synthesized and cloned into pYES2.1 TOPO vector whose UAS <sub>G</sub> sequence was removed by PCR, resulting in pL8Gal1 plasmid. mCherry encoding gene was amplified from pLEVI-mCherry and cloned into pL8Gal1 using BamHI and EcoRI digestion to obtain pL8Gal1-mCherry. | 2 $\mu$            | URA3               | This work           |
| pL4Gal1-mCherry | A reporter vector for $\gamma$ LighOn system containing four copies of LexA operator                                                                                                                                                                                                                                                                                                                                                                                          | 2 $\mu$            | URA3               | This work           |

|                   |                                                                                                                                                                                                                                                                                                    |    |      |           |
|-------------------|----------------------------------------------------------------------------------------------------------------------------------------------------------------------------------------------------------------------------------------------------------------------------------------------------|----|------|-----------|
|                   | sequence and Gal1 minimal promoter driven expression of mCherry. Four copies of LexA operator sequence was synthesized and cloned into pL8Gal1-mCherry using Acc651 and XhoI digestion to obtain pL4Gal1-mCherry.                                                                                  |    |      |           |
| pL2Gal1-mCherry   | A reporter vector for yLigthOn system containing two copies of LexA operator sequence and Gal1 minimal promoter driven expression of mCherry. pL4Gal1-mCherry was amplified using primers containing two copies of LexA operator sequences; the linearized vector was phosphoresced and ligated.   | 2μ | URA3 | This work |
| pL1Gal1-mCherry   | A reporter vector for yLigthOn system containing single copy of LexA operator sequence and Gal1 minimal promoter driven expression of mCherry. pL4Gal1-mCherry was amplified using primers containing single copy of LexA operator sequences; the linearized vector was phosphoresced and ligated. | 2μ | URA3 | This work |
| pL8CYC-mCherry    | A reporter vector for yLigthOn system containing eight copies of LexA operator sequence and CYC minimal promoter driven expression of mCherry. CYC promoter was PCR-amplified from the yeast BY4742 genome, digested and ligated into XhoI and BamHI sites of pL8Gal1-mCherry.                     | 2μ | URA3 | This work |
| pL8cyc100-mCherry | A reporter vector for yLigthOn system containing eight copies of LexA operator sequence and cyc100 minimal promoter driven expression of mCherry. Single mutation by reverse PCR was performed on the basis of pL8CYC-mCherry.                                                                     | 2μ | URA3 | This work |
| pL8cyc70-mCherry  | A reporter vector for yLigthOn system containing eight copies of LexA operator sequence and cyc70 minimal promoter driven expression of mCherry. Single mutation by reverse PCR was performed on the basis of pL8CYC-mCherry.                                                                      | 2μ | URA3 | This work |
| pL8cyc43-mCherry  | A reporter vector for yLigthOn system containing eight copies of LexA operator sequence and cyc43 minimal promoter driven expression of mCherry. Mutations                                                                                                                                         | 2μ | URA3 | This work |

|                       |                                                                                                                                                                                                                                                                                                  |         |      |           |
|-----------------------|--------------------------------------------------------------------------------------------------------------------------------------------------------------------------------------------------------------------------------------------------------------------------------------------------|---------|------|-----------|
|                       | by reverse PCR was performed on the basis of pL8CYC-mCherry.                                                                                                                                                                                                                                     |         |      |           |
| pL8cyc28-mCherry      | A reporter vector for $\gamma$ LigthOn system containing eight copies of LexA operator sequence and cyc28 minimal promoter driven expression of mCherry. Mutations by reverse PCR was performed on the basis of pL8CYC-mCherry.                                                                  | 2 $\mu$ | URA3 | This work |
| pL8cyc16-mCherry      | A reporter vector for $\gamma$ LigthOn system containing eight copies of LexA operator sequence and cyc16 minimal promoter driven expression of mCherry. Mutations by reverse PCR was performed on the basis of pL8CYC-mCherry.                                                                  | 2 $\mu$ | URA3 | This work |
| pL8Gal1(10)- mCherry  | A reporter vector for $\gamma$ LigthOn system containing eight copies of LexA operator sequence and Gal1 minimal promoter with a 10 bp spacer between them. pL8Gal1-mCherry was amplified using primers containing 10 bp random sequences; the linearized vector was phosphoresced and ligated.  | 2 $\mu$ | URA3 | This work |
| pL8Gal1(20)- mCherry  | A reporter vector for $\gamma$ LigthOn system containing eight copies of LexA operator sequence and Gal1 minimal promoter with a 20 bp spacer between them. pL8Gal1-mCherry was amplified using primers containing 20 bp random sequences; the linearized vector was phosphoresced and ligated.  | 2 $\mu$ | URA3 | This work |
| pL8Gal1(50)- mCherry  | A reporter vector for $\gamma$ LigthOn system containing eight copies of LexA operator sequence and Gal1 minimal promoter with a 50 bp spacer between them. pL8Gal1-mCherry was amplified using primers containing 50 bp random sequences; the linearized vector was phosphoresced and ligated.  | 2 $\mu$ | URA3 | This work |
| pL8Gal1(100)- mCherry | A reporter vector for $\gamma$ LigthOn system containing eight copies of LexA operator sequence and Gal1 minimal promoter with a 100 bp spacer between them. A 100 bp random sequence spacer was synthesized and inserted into pL8Gal1-mCherry using Hieff Clone™ One Step Cloning Kit (YEASEN). | 2 $\mu$ | URA3 | This work |



|                             |                                                                                                                                                                                                                                                                                                                                                                                                                                                              |    |      |           |
|-----------------------------|--------------------------------------------------------------------------------------------------------------------------------------------------------------------------------------------------------------------------------------------------------------------------------------------------------------------------------------------------------------------------------------------------------------------------------------------------------------|----|------|-----------|
| pL8Gal1(200)- mCherry       | A reporter vector for yLighOn system containing eight copies of LexA operator sequence and Gal1 minimal promoter with a 200 bp spacer between them. A 200 bp random sequence spacer was synthesized and inserted into pL8Gal1-mCherry using Hieff Clone™ One Step Cloning Kit (YEASEN).                                                                                                                                                                      | 2μ | URA3 | This work |
| pL8Gal1(500)- mCherry       | A reporter vector for yLighOn system containing eight copies of LexA operator sequence and Gal1 minimal promoter with a 500 bp spacer between them. A 500 bp random sequence spacer was synthesized and inserted into pL8Gal1-mCherry using Hieff Clone™ One Step Cloning Kit (YEASEN).                                                                                                                                                                      | 2μ | URA3 | This work |
| pL8Gal1(truncation)-mCherry | A reporter vector for yLightOn system containing eight copies of LexA operator sequence and Gal1(truncation) minimal promoter. Truncation was performed by reverse PCR on the basis of pL8Gal1-mCherry.                                                                                                                                                                                                                                                      | 2μ | URA3 | This work |
| pADH1-LVAD                  | Constitutive expression of LVAD under the control of ADH1 promoter. LEVI amplified from pLEVI-mCherry was fused to Gal4AD-NLS by overlap PCR to obtain LVAD gene fragment. pGADT7 vector was linearized using reverse PCR to remove the original Gal4AD sequence and the multiple cloning site (MCS), and to introduce new EcoRI and XhoI sites at the two ends. The LVAD gene fragment-was then ligated into EcoRI and XhoI sites of the linearized pGADT7. | 2μ | LEU2 | This work |
| pADH1(410)-LVAD             | Constitutive expression of LVAD under the control of ADH1(410) promoter. ADH1(410) promoter was PCR-amplified from pGADT7 vector, digested and ligated into XbaI and EcoRI sites of pADH1-LVAD.                                                                                                                                                                                                                                                              | 2μ | LEU2 | This work |
| pADH1(210)-LVAD             | Constitutive expression of LVAD under the control of ADH1(210) promoter. ADH1(210) promoter was PCR-amplified from pGADT7 vector, digested and ligated into XbaI and EcoRI sites of pADH1-LVAD.                                                                                                                                                                                                                                                              | 2μ | LEU2 | This work |

|                                    |                                                                                                                                                                                                                                                                                      |    |      |           |
|------------------------------------|--------------------------------------------------------------------------------------------------------------------------------------------------------------------------------------------------------------------------------------------------------------------------------------|----|------|-----------|
| pPMA1-LVAD                         | Constitutive expression of LVAD under the control of PMA1 promoter.<br>PMA1 promoter was PCR-amplified from the yeast BY4742 genome, digested and ligated into XbaI and EcoRI sites of pADH1-LVAD.                                                                                   | 2μ | LEU2 | This work |
| pL8Gal1-His3                       | A reporter vector for yLigthOn system using His3 as the reporter. His3 gene was synthesized and ligated into BamHI and EcoRI of pL8Gal1-mCherry.                                                                                                                                     | 2μ | URA3 | This work |
| pL8Gal1- <sup>ΔN</sup> Sic1        | A reporter vector for yLigthOn system using <sup>ΔN</sup> Sic1 as the reporter. <sup>ΔN</sup> Sic1 was PCR-amplified from the yeast BY4742 genome, digested and ligated into BamHI and EcoRI of pL8Gal1-mCherry.                                                                     | 2μ | URA3 | This work |
| pADH1(410)-LVAD (mutants)          | Constitutive expression of LVAD variants under control of ADH(410) promoter. Mutations by reverse PCR was performed on the basis of pADH1(410)-LVAD.                                                                                                                                 | 2μ | LEU2 | This work |
| pBi-mCherry-sfGFP                  | A bidirectional module using mCherry and sfGFP as the reporters. Gal1 minimal promoter amplified from pL8Gal1-mCherry was fused to sfGFP-ADH terminator sequence. The fused fragment was digested and ligated into Acc65I and SacI sites of pL8Gal1-mCherry.                         | 2μ | URA3 | This work |
| pBi-ClpX-ClpP                      | A bidirectional module using ClpP and ClpX as the reporters. ClpP and ClpX amplified from the <i>E.coli</i> genome, were digested and ligated into BglII/HindIII and BamHI/EcoRI sites of pBi-mCherry-sfGFP, respectively.                                                           | 2μ | URA3 | This work |
| pYE-ADH1-mCherry                   | Vector constitutive expression of mCherry under the control of ADH1 promoter. ADH1-mCherry was PCR-amplified from pADH1-mCherry, digested and ligated into the linearized pYES2.1 TOPO vector using BamHI and EcoRI digestion.                                                       | 2μ | URA3 | This work |
| pADH1(410)-LVADO-ADH1-mCherry-ssrA | Vector containing ADH1(410)-driven expression of LVADO and ADH1-driven expression of mCherry-ssrA. ADH1-mCherry-ssrA amplified from pYE-ADH1-mCherry was fused to CYC terminator sequence amplified from pL8CYC100-mCherry; the obtained fragment was digested and ligated into XbaI | 2μ | LEU2 | This work |

|                               |                                                                                                                                                                                                                                                                                                                                                                                                                 |    |      |           |
|-------------------------------|-----------------------------------------------------------------------------------------------------------------------------------------------------------------------------------------------------------------------------------------------------------------------------------------------------------------------------------------------------------------------------------------------------------------|----|------|-----------|
|                               | and Sall of plasmid pADH1(410)-LVADO.                                                                                                                                                                                                                                                                                                                                                                           |    |      |           |
| pADH1(410)-LVADO-ADH1-mCherry | Vector containing ADH1(410) driven expression of LVADO and ADH1-driven expression of mCherry.                                                                                                                                                                                                                                                                                                                   | 2μ | LEU2 | This work |
| pU5Gal1-mCherry               | A reporter vector containing five copies of UAS <sub>G</sub> , Gal1 minimal promoter and mCherry reporter. Five copies of UAS <sub>G</sub> was amplified from pU5-Gluc and inserted into Acc65I and XhoI sites of pL8Gal1-mCherry.                                                                                                                                                                              | 2μ | URA3 | This work |
| pPMA1-mCherry                 | Vector constitutive expression of mCherry under the control of PMA1 promoter. PMA1 promoter amplified from the BY4742 genome was fused to mCherry gene; the obtained fragment was digested and ligated into the linearized pYES2.1 TOPO vector using BamHI and EcoRI digestion.                                                                                                                                 | 2μ | URA3 | This work |
| pU5Gal1-mCherry               | A reporter vector for CRY2/CIB1 system containing five copies of UAS <sub>G</sub> sequence and Gal1 minimal promoter driven expression of mCherry. 5xUAS <sub>G</sub> -Gal1 promoter sequence amplified from pYES2.1 TOPO was fused to mCherry by overlapping PCR to obtain 5xUAS <sub>G</sub> -Gal1-mCherry gene fragment that was then inserted into pSH18-34 vector using Hieff Clone™ One Step Cloning Kit. | 2μ | URA3 | This work |
| pADH1-mCherry-ssrA            | Vector containing ADH1 promoter driven expression of mCherry-ssrA. pADH1(410)-LVADO-ADH1-mCherry-ssrA was amplified using reverse PCR to remove ADH1(410)-LVADO sequence. The linearized fragment was phosphorylated and ligated.                                                                                                                                                                               | 2μ | LEU2 | This work |
| pADH1-mCherry-psd             | Vector containing ADH1 promoter driven expression of mCherry-psd. ssrA sequence in pADH1-mCherry-ssrA was then replaced by the synthesized AtLOV2-cODC (psd) sequence using Hieff Clone™ One Step Cloning Kit.                                                                                                                                                                                                  | 2μ | LEU2 | This work |
| pCUP1-mCherry                 | Vector containing copper ion inducible CUP1 promoter driven the expression of mCherry reporter. CUP1 promoter was PCR-amplified from the yeast BY4742                                                                                                                                                                                                                                                           | 2μ | URA3 | This work |

|                                   |                                                                                                                                                                                                                                                                 |         |      |           |
|-----------------------------------|-----------------------------------------------------------------------------------------------------------------------------------------------------------------------------------------------------------------------------------------------------------------|---------|------|-----------|
|                                   | genome, and then was digested and ligated into Acc651 and BamHI sites of pL8Gal1-mCherry.                                                                                                                                                                       |         |      |           |
| pGal1-mCherry                     | Vector containing galactose inducible Gal1 promoter driven the expression of mCherry reporter. Gal1 promoter was PCR-amplified from pYES2.1 TOPO, and was then digested and ligated into Acc651 and BamHI of pL8Gal1-mCherry.                                   | 2μ      | URA3 | This work |
| pRS313                            | A single copy plasmid using HIS3 as a selective screening marker.                                                                                                                                                                                               | CEN/ARS | HIS3 | ATCC      |
| pRS315                            | A single copy plasmid using LEU2 as a selective screening marker.                                                                                                                                                                                               | CEN/ARS | LEU2 | ATCC      |
| pRS316                            | A single copy plasmid using URA3 as a selective screening marker.                                                                                                                                                                                               | CEN/ARS | URA3 | ATCC      |
| pRS315-ADH1(410)-LVADO            | A single copy vector containing a constitutive promoter ADH1(410) driven the expression of transcription factor LVADO. ADH1(410)-LVADO was PCR-amplified from pADH1(410)-LVADO-ADH1-mCherry-ssrA, and then was digested and ligated in NotI and SmaI of pRS315. | CEN/ARS | LEU2 | This work |
| pRS315-PMA1-LVADO                 | A single copy vector containing a constitutive promoter PMA1 driven the expression of transcription factor LVADO. PMA1 promoter was PCR-amplified from pPMA1-LVAD and inserted into pRS315-ADH1(410)-LVADO using Hieff Clone™ One Step Cloning Kit (YEASEN).    | CEN/ARS | LEU2 | This work |
| pRS315-ADH1-LVADO                 | A single copy vector containing a constitutive promoter ADH1 driven the expression of transcription factor LVADO. ADH1 promoter was PCR-amplified from pADH1-LVAD and inserted into pRS315-ADH1(410)-LVADO using Hieff Clone™ One Step Cloning Kit (YEASEN).    | CEN/ARS | LEU2 | This work |
| pRS316-L8Gal1-mCherry             | A reporter vector with single copy containing eight copies of LexA operator sequence and Gal1 minimal promoter driven expression of mCherry. L8Gal1-mCherry was PCR-amplified from pL8Gal1-mCherry and digested and ligated in NotI and SmaI of pRS316.         | CEN/ARS | URA3 | This work |
| pRS316-L8Gal1- <sup>ΔN</sup> Sic1 | A reporter vector with single copy using <sup>ΔN</sup> Sic1 as the reporter. L8Gal1- <sup>ΔN</sup> Sic1 was PCR-amplified from pL8Gal1- <sup>ΔN</sup> Sic1 and cloned into pRS316 using NotI and SmaI                                                           | CEN/ARS | URA3 | This work |

|                       |                                                                                                                                                                                                                                                                                                                                                                                                                                                                                                                                   |         |      |           |
|-----------------------|-----------------------------------------------------------------------------------------------------------------------------------------------------------------------------------------------------------------------------------------------------------------------------------------------------------------------------------------------------------------------------------------------------------------------------------------------------------------------------------------------------------------------------------|---------|------|-----------|
| pRS315-U5Gal1-mCherry | digestion to obtain pL8Gal1-mCherry.<br>A reporter vector with single copy containing five copies of UAS <sub>G</sub> , Gal1 minimal promoter and mCherry reporter. U5Gal1-mCherry was PCR-amplified from pU5Gal1-mCherry and inserted into pRS315 using Hieff Clone™ One Step Cloning Kit (YEASEN).                                                                                                                                                                                                                              | CEN/ARS | LEU2 | This work |
| pRS316-ACT1-GEV       | A single copy vector containing a constitutive <i>ACT1</i> promoter, Gal4 DNA binding domain, hormone binding domain(ER), and herpes simplex virus protein VP16(activation domain). <i>ACT1</i> promoter sequence was synthesized and digested and ligated in NotI and SpeI of pRS316, resulting in pRS316-ACT1 plasmid. Gal4 DNA binding domain PCR-amplified from pGAVPO was fused with hormone binding domain(ER) and VP16 synthesized to obtain GEV fragment, and then digested and ligated in SpeI and EcoRI of pRS316-ACT1. | CEN/ARS | URA3 | This work |

## Supplementary Note

### LVADO protein sequence

MKALTARQQEVFDLIRDHISQTGMPPTRAEIAQRLGFRSPNAAEEHLKALARKGVIEIVSGASRGIRLLQEE  
EEGLPLVGRVAAGEPQHTLYAPGGYDIMGWLIQIMKRPNPQVELGPVDTSVAILLCDLKQKDTPPVYASEA  
FLYMTGYSNAEVLGRNCRFLQSPDGMVKPKSTRKYVDSNTINTIRKAIDRNAEVQVEVVNFKKNGQRFV  
NFLTMIPVRDETGEYRYSMGFCETEGSGGGGSGGGGSNFNQSGNIADSSLSFTFTNSSNGPNLITTQTN  
SQALSQPIASSNVHDNFMNNEITASKIDDGNNKPLSPGWTDQTAYNAFGITTMFMNTTTMDDVYNLYF  
DDEDTPPNPKKESTSELPPKKRKVEDP

### 8xLexA<sub>op</sub>-Gal1 minimal promoter-mCherry DNA sequence

CTGTATATAAAACCAAGTGGTTATATGTACAGTACTGCTGTATATAAAACCAAGTGGTTATATGTACAGTACGGCG  
CGCCTGCTGTATATAAAACCAAGTGGTTATATGTACAGTACTGCTGTATATAAAACCAAGTGGTTATATGTACAGTA  
CGGCGCGCCGCTAGCGGGGGGCTATAAACTCGAGAACATAAAGATTCTACAATACTAGCTTTTATGGTTAT  
GAAGAGGAAAAATTGGCAGTAACCTGGCCCCACAACTTCAAATGAACGAATCAAATTAACAACCATAGG  
ATGATAATGCGATTAGTTTTTTAGCCTTATTTCTGGGGTAATTAATCAGCGAAGCGATGATTTTTGATCTATTAA  
CAGATATATAAATGCAAAACTGCATAACCACTTAACTAATACTTTCAACATTTTCGGTTTGTATTACTTCTTAT  
TCAAATGTAATAAAAGTATCAACAAAAAATTGTTAATATACCTCTATACTTTAACGTCAAGGAGGGATCCAAAA  
AAATGGTGAGCAAGGGCGAGGAGGATAACATGGCCATCATCAAGGAGTTCATGCGCTTCAAGGTGCACAT  
GGAGGGCTCCGTGAACGGCCACGAGTTCGAGATCGAGGGCGAGGGCGAGGGCCGCCCTACGAGGGCA  
CCCAGACCGCCAAGCTGAAGGTGACCAAGGGTGCCCCCTGCCCTTCGCTGGGACATCCTGTCCCCTCAG  
TTCATGTACGGCTCCAAGGCCTACGTGAAGCACCCCGCCGACATCCCCGACTACTGAAGCTGTCTTCCCC  
GAGGGCTTCAAGTGGGAGCGCGTGATGAACCTCGAGGACGGCGCGTGGTGACCGTGACCCAGGACTCC  
TCCCTGCAGGACGGCGAGTTCATCTACAAGGTGAAGCTGCGCGGCACCAACTTCCCCTCCGACGGCCCCGT  
AATGCAGAAGAAGACCATGGGCTGGGAGGCCTCCTCCGAGCGGATGTACCCGAGGACGGCGCCCTGAA  
GGGCGAGATCAAGCAGAGGCTGAAGCTGAAGGACGGCGGCCACTACGACGCTGAGGTCAAGACCACCTA  
CAAGGCCAAGAAGCCCGTCAGCTGCCCGCGCCTACAACGTCAACATCAAGTTGGACATCACCTCCCACA  
ACGAGGACTACACCATCGTGAACAGTACGAACGCGCCGAGGGCCGCACTCCACCGCGGCATGGACGA  
GCTGTACAAGTAA

### sfGFP-Gal1 minimal promoter-8xLexA<sub>op</sub>-Gal1 minimal promoter-mCherry DNA sequence

TTACTTGACAGCTCGTCCATGCCGTGAGTGATCCCGGCGGCGGTACGAACTCCAGCAGGACCATGTGATC  
GCGCTTCTCGTTGGGGTCTTTGCTCAGCACGGACTGGGTGCTCAGGTAGTGGTTGTCGGGCAGCAGCACG  
GGCCGTCGCCGATGGGGGTGTTCTGCTGGTAGTGGTGGCGAGCTGCACGCTGCCGTCTCCACGTTGTG  
GCGGATCTTGAAGTTGGCCTTGATGCCGTTCTTCTGCTTGTGCGCCGTGATATAGACGTTGTGGCTGTTGAA  
GTTGTACTCCAGCTTGTGCCCCAGGATGTTGCCGTCTCCTGAAGTCGATGCCCTCAGCTCGATGCGGTTT  
ACCAGGGTGTGCCCTCGAACTTCACCTCGGCGCGGGTCTGTATGTGCCGTGCTCCTGAAACTGATGGTG  
CGCTCCTGGACGTAGCTTCGGGCATGGCGGACTTGAAGAAGTCGTGGCGCTTCATGTGGTCGGGGTAGC  
GGCTGAAGCACTGCACGCCGTAGGTCAGGGTGGTCACGAGGGTGGGCCAGGGCACGGGCAGCTTGCCGG  
TGGTGAGATGAACCTCAGGGTCAGCTTGCCATTGGTGGCATGCCCCGCGCTCGCCTCTCACGCTGAAC  
TGTGGCCGTTTACGTCGCCGTCCAGCTCGACCAGGATGGGCACCAACCCCGGTGAACAGCTCCTCGCCCTTG  
CTACCATAGATCTTGACGTTAAAGTATAGAGGTATATTAACAATTTTTTGTGATACTTTTATGACATTTGAA  
TAAGAAGTAATACAACTGAAAATGTTGAAAGTATTAGTTAAAGTGGTTATGCAGTTTTTGCATTTATATATCT

GTTAATAGATCAAAAATCATCGCTTCGCTGATTAATTACCCAGAAATAAGGCTAAAAAACTAATCGCATTATC  
ATCCTATGGTTGTTAATTTGATTCGTTCAATTTGAAGGTTTGTGGGGCCAGGTTACTGCCAATTTTCTCTTCA  
TAACCATAAAAGCTAGTATTGTAGAATCTTTATTGTTCTCGAGTTTATAGCCCCCGGTACCTGCTGTATATAAA  
ACCAAGTGGTTATATGTACAGTACTGCTGTATATAAAACCAAGTGGTTATATGTACAGTACGGCGCGCCTGCTGT  
TATAAAACCAAGTGGTTATATGTACAGTACTGCTGTATATAAAACCAAGTGGTTATATGTACAGTACGGCGCGCCG  
CTAGCGGGGGGCTATAAACTCGAGAACATAAAGATTCTACAATACTAGCTTTTATGGTTATGAAGAGGAAA  
AATTGGCAGTAACCTGGCCCCACAAACCTTCAAATGAACGAATCAAATTAACAACCATAGGATGATAATGCG  
ATTAGTTTTTTAGCCTTATTTCTGGGGTAATTAATCAGCGAAGCGATGATTTTTGATCTATTAACAGATATATA  
ATGCAAAAACCTGCATAACCACTTTAACTAATACTTTCAACATTTTCAGTTTGTATTACTTCTATTCAAATGTCAT  
AAAAGTATCAACAAAAAATTGTTAATATACCTCTATACTTTAACGTCAAGGATCCAAAAAATGGTGAGCAAG  
GGCGAGGAGGATAACATGGCCATCATCAAGGAGTTCATGCGCTTCAAGGTGCACATGGAGGGCTCCGTGA  
ACGGCCACGAGTTCGAGATCGAGGGCGAGGGCGAGGGCCGCCCTACGAGGGCACCCAGACCGCCAAGC  
TGAAGGTGACCAAGGGTGGCCCCCTGCCCTTCGCTGGGACATCCTGTCCCCTCAGTTCATGTACGGCTCCA  
AGGCTACGTGAAGCACCCGCCGACATCCCCGACTACTTGAAGCTGTCTTCCCCGAGGGCTTCAAGTGG  
GAGCGCGTGATGAACTTCGAGGACGGCGGCGTGGTGACCGTGACCCAGGACTCCTCCCTGCAGGACGGC  
GAGTTCATCTACAAGGTGAAGCTGCGCGGCACCAACTTCCCCTCCGACGGCCCCGTAATGCAGAAGAAGAC  
CATGGGCTGGGAGGCCTCCTCCGAGCGGATGTACCCCGAGGACGGCGCCCTGAAGGGCGAGATCAAGCA  
GAGGCTGAAGCTGAAGGACGGCGGCCACTACGACGCTGAGGTCAAGACCACCTACAAGGCCAAGAAGCC  
CGTGCAGCTGCCGGCGCCTACAACGTCAACATCAAGTTGGACATCACCTCCCACAACGAGGACTACACCAT  
CGTGGAACAGTACGAACGCGCCGAGGGCCGCCACTCCACCGGCGGCATGGACGAGCTGTACAAGTAA

#### ClpP-Gal1 minimal promoter-8xLexA<sub>op</sub>-Gal1 minimal promoter-ClpX DNA sequence

TCAATTACGATGGGTCAGAATCGAATCGACCAGACCGTATTCCACCGCTTCAGGGGCGGAAAGGAAGCGAT  
CGCGCTCGGTATCACGTTCAATCTGTTCTAATGATTGACCGTATGAAGCGCCATAAGTTCATTCATCGCCCT  
TTAACTTTCAGAATTTACGGGCATGAATTCGATATCGGTCGCTGGCCCTGGTAGCCGCCAACGGTTGG  
TGAATCATCACGCGGAATTCGGCAGGCAAAAACGTTTACCTTTTGGCCCTGCGGTCAGCAAGAAAGCGCC  
CATCGAGGCCGCTGGCCCATACAGATGGTGCTGACATCAGGCTTGATAAACTGCATGGTGTCATAGATAGA  
CATCCCGGCAGTGATACCCCGCTGGGGAGTTAATGTACAGATAGATATCTTTTTCTGGGTTTTCCGCTTCC  
AGGAACAGCATCTGCGCCACAATCAGGTTAGCCATGTGGTCTTCAACCTGGCCAGTCAGAAAAATGACGCG  
TTCCTTAAGTAGACGAGAATAGATATCAAAGAGCGCTACCGCGTGAGGTCTGTTCAATGACCATCGGCAC  
CAGCGCCATATGGGGTGCAAAGTTATCTCGTTCGCCGCTGTATGACATAGATCTTGACGTTAAAGTATAGAG  
GTATATTAACAATTTTTTGTGATACTTTTATGACATTTGAATAAGAAGTAATACAACTGAAAATGTTGAAAG  
TATTAGTTAAAGTGTTATGCAGTTTTTGCAATTTATATATCTGTTAATAGATCAAAAATCATCGCTTCGCTGATTA  
ATTACCCAGAAATAAGGCTAAAAAACTAATCGCATTATCATCTATGGTTGTTAATTTGATTCGTTCAATTTGAA  
GGTTTGTGGGGCCAGGTTACTGCCAATTTTTCTCTTCATAACCATAAAAGCTAGTATTGTAGAATCTTTATTG  
TTCTCGAGTTTATAGCCCCCGGTACCTGCTGTATATAAAACCAAGTGGTTATATGTACAGTACTGCTGTATATA  
AACCAAGTGGTTATATGTACAGTACGGCGCGCCTGCTGTATATAAAACCAAGTGGTTATATGTACAGTACTGCTGT  
ATATAAAACCAAGTGGTTATATGTACAGTACGGCGCGCCGCTAGCGGGGGGCTATAAACTCGAGAACATAAA  
GATTCTACAATACTAGCTTTTATGGTTATGAAGAGGAAAAATTGGCAGTAACCTGGCCCCACAAACCTTCAAA  
TGAACGAATCAAATTAACAACCATAGGATGATAATGCGATTAGTTTTTTAGCCTTATTTCTGGGGTAATTAATC  
AGCGAAGCGATGATTTTTGATCTATTAACAGATATATAAATGCAAAAACCTGCATAACCACTTTAACTAATACTT  
TCAACATTTTCAGTTTGTATTACTTCTATTCAAATGTCATAAAAGTATCAACAAAAAATTGTTAATATACCTCTA  
TACTTTAACGTCAAGGATCCAAAAAATGACAGATAAACGCAAAGATGGCTCAGGCAAATTGCTGTATTGCT  
CTTTTTGCGGCAAAAGCCAGCATGAAGTGCGAAGCTGATTGCCGGTCCATCCGTGTATATCTGCGACGAAT

GTGTTGATTATGTAACGACATCATTCGCGAAGAGATTAAAGAAGTTGCACCGCATCGTGAACGCAGTGCGC  
TACCGACGCCGCATGAAATTCGCAACCACCTGGACGATTACGTTATCGGCCAGGAACAGGCGAAAAAAGTG  
CTGGCGGTGCGGGTATACAACCATTACAAACGTCTGCGCAACGGCGATACCAGCAATGGCGTCGAGTTGGG  
CAAAAGTAACATTCTGCTGATCGGTCCGACCGTTCCGGTAAACGCTGCTGGCTGAAACGCTGGCGCGCC  
TGCTGGATGTTCCGTTACCATGGCCGACGCGACTACACTGACCGAAGCCGTTATGTGGGTGAAGACGTT  
GAAAAATCATTTCAGAAGCTGTTGCAGAAATGCGACTACGATGTCCAGAAAGCACAGCGTGGTATTGTCTAC  
ATCGATGAAATCGACAAGATTTCTCGTAAGTCAGACAACCCGTCCATTACCCGAGACGTTTCCGGTGAAGGC  
GTACAGCAGGCACTGTTGAAACTGATCGAAGGTACGGTAGCTGCTGTTCCACCGCAAGGTGGGCGTAAACA  
TCCGCAGCAGGAATTCTTGAGGTTGATACCTCTAAGATCCTGTTTATTTGTGGCGGTGCGTTTGCCGGTCTG  
GATAAAGTGATTTCCACCGTGTAGAAACCGGCTCCGGCATTGGTTTTGGCGCGACGGTAAAGCGAAGTC  
CGACAAAGCAAGCGAAGGCGAGCTGCTGGCGCAGGTTGAACCGGAAGATCTGATCAAGTTTGGTCTTATC  
CCTGAGTTTATTGGTCGTCTGCCGTTGTGCGAACGTTGAATGAACTGAGCGAAGAAGCTCTGATTAGATC  
CTCAAAGAGCCGAAAAACGCCCTGACCAAGCAGTATCAGGCGCTGTTTAACTCTGGAAGGCGTGGATCTGGA  
ATTCCGTGACGAGGCGCTGGATGCTATCGTAAGAAAGCGATGGCGCGTAAACCGGTGCCGTGGCCTGC  
GTTCCATCGTAGAAGCCGCACTGCTCGATACCATGTACGATCTGCCGTCCATGGAAGACGTCGAAAAAGTGG  
TTATCGACGAGTCGGTAATTGATGGTCAAAGCAAACCGTTGCTGATTATGGCAAGCCGGAAGCGCAACAG  
GCATCTGGTGAATAA

#### ADH1 promoter-mCherry-ssrA

ATCCTTTTGTTGTTTCCGGGTGTACAATATGGACTTCCTCTTTTCTGGCAACCAAACCCATACATCGGGATTCC  
TATAATACCTTCGTTGGTCTCCCTAACATGTAGGTGGCGGAGGGGAGATATACAATAGAACAGATACCAGACA  
AGACATAATGGGCTAAACAAGACTACACCAATTACACTGCCTCATTGATGGTGGTACATAACGAACATACT  
GTAGCCCTAGACTTGATAGCCATCATCATATCGAAGTTTCACTACCTTTTTCCATTGCCATCTATTGAGGTAA  
TAATAGGCGCATGCAACTTCTTTTCTTTTTTTTTCTTTTCTCTCTCCCCGTTGTTGTCTACCATATCCGCAAT  
GACAAAAAATGATGGAAGACACTAAAGGAAAAAATTAACGACAAAGACAGCACCAACAGATGTCGTTGT  
TCCAGAGCTGATGAGGGGTATCTCGAAGCACAGAACTTTTTCTTCTCCTTCATTACGCACACTACTCTCTA  
ATGAGCAACGGTATACGGCCTTCTTCCAGTTACTTGAATTTGAAATAAAAAAAGTTTGCTGTCTTGCTATC  
AAGTATAAATAGACCTGCAATTATTAATCTTTGTTTCTCGTCATTGTTCTCGTTCCCTTCTCTTGTTCCTT  
TTTCTGCACAATATTTCAAGCTATACCAAGCATACAATCAACTAGCTTTGCAAAGATGGCCATGGCTTCCAGAT  
CTGTTTCTCTAGAGGTTCTGGATCCGCTATGGTGAGCAAGGGCGAGGAGGATAACATGGCCATCATCAAG  
GAGTTCATGCGCTTCAAGGTGCACATGGAGGGCTCCGTGAACGGCCACGAGTTCGAGATCGAGGGCGAGG  
GCGAGGGCCGCCCTACGAGGGCACCCAGACCGCCAAGCTGAAGGTGACCAAGGGTGGCCCCCTGCCCTT  
CGCCTGGGACATCCTGTCCCCTCAGTTATGTACGGCTCCAAGGCCTACGTGAAGCACCCCGCCGACATCCC  
CGACTACTTGAAGCTGTCCTTCCCCGAGGGCTTCAAGTGGGAGCGCGTGATGAACTTCGAGGACGGCGGC  
GTGGTGACCGTGACCCAGGACTCCTCCCTGCAGGACGGCGAGTTCATCTACAAGGTGAAGCTGCGCGGCA  
CCAACTTCCCTCCGACGGCCCCGTAATGCAGAAGAAGACCATGGGCTGGGAGGCCTCCTCCGAGCGGATG  
TACCCGAGGACGGCGCCCTGAAGGGCGAGATCAAGCAGAGGCTGAAGCTGAAGGACGGCGGCCACTAC  
GACGCTGAGGTCAAGACCACCTACAAGGCCAAGAAGCCCGTGACGCTGCCGGCGCCTACAACGTCAACA  
TCAAGTTGGACATCACCTCCACAACGAGGACTACACCATCGTGGAACAGTACGAACGCGCCGAGGGCCGC  
CACTCCACCGGCGGCATGGACGAGCTGTACAAGACTATGGGCGGCGGTTCTGCTGCGAACGATGAAAAC  
CGCACTGGCTGCGTAA



## Reference

1. Olson, E.J., Hartsough, L.A., Landry, B.P., Shroff, R. and Tabor, J.J. (2014) Characterizing bacterial gene circuit dynamics with optically programmed gene expression signals. *Nat Methods*. 11, 449-455.
2. Chen, X., Liu, R., Ma, Z., Xu, X., Zhang, H., Xu, J., Ouyang, Q. and Yang, Y. (2016) An extraordinary stringent and sensitive light-switchable gene expression system for bacterial cells. *Cell Res*. 26, 854-857.
3. Wang, X., Chen, X. and Yang, Y. (2012) Spatiotemporal control of gene expression by a light-switchable transgene system. *Nat Methods*. 9, 266-269.
